# Supplementary material
Source: Elsevier journal article supplement (https://www.sciencedirect.com/science/article/pii/S1853002819300692)
Supplement: mmc1 [file S1853002819300692:mmc1.pdf]

## **Material suplementario**

### **Material suplementario 1: Resumen de búsqueda bibliográfica por pregunta clínica**

| <b>Pregunta N°</b> | <b>Fechas de búsqueda (desde, hasta)</b> | <b>Citaciones identificadas</b> | <b>Citaciones evaluadas</b> | <b>Estudios incluidos (autor, año)</b>                           |
|--------------------|------------------------------------------|---------------------------------|-----------------------------|------------------------------------------------------------------|
| 1                  | Mayo 2008 a mayo 2018                    | 299                             | 23                          | 2<br>Mateen, 2011 (Observacional)<br>Fokke, 2013 (Observacional) |
| 2                  | Enero 2008 a mayo 2018                   | 48                              | 4                           | 1<br>Chevret, 2017 (RS)                                          |
| 3                  | Mayo 2008 a mayo 2018                    | 34                              | 4                           | 2<br>Hughes, 2014 (RS)<br>Ortiz-Salas, 2016 (RS)                 |
| 4                  | Enero 2008 a mayo 2018                   | 149                             | 2                           | 1<br>Hughes, 2016 (RS)                                           |
| 5                  | Enero 2008 a mayo 2018                   | 222                             | 1                           | 1<br>Damian, 2013 (Observacional)                                |
| 6                  | Enero 2008 a mayo 2018                   | 255                             | 3                           | 2<br>Khan, 2010 (RS)<br>Khan, 2012 (RS)                          |

RS: Revisiones sistemáticas

## Material suplementario 2: Términos de búsqueda por pregunta clínica

### Pregunta 1. En pacientes con sospecha de Síndrome de Guillain-Barre ¿Cuáles son los criterios válidos para el diagnóstico?

|                                                                                                                                                   |                 |                                                                                                                                                                                                                                                |
|---------------------------------------------------------------------------------------------------------------------------------------------------|-----------------|------------------------------------------------------------------------------------------------------------------------------------------------------------------------------------------------------------------------------------------------|
| Base de datos: Medline                                                                                                                            |                 |                                                                                                                                                                                                                                                |
| Fecha de búsqueda: mayo 2018                                                                                                                      |                 |                                                                                                                                                                                                                                                |
| Filtros: Fecha de publicación desde: Inicio de los tiempos, Revisión sistemática o Meta-análisis, ensayos clínicos aleatorizados, observacionales |                 |                                                                                                                                                                                                                                                |
|                                                                                                                                                   | Descripción     | Término                                                                                                                                                                                                                                        |
| 1                                                                                                                                                 | Población       | inflammatory polyneuropath*[Title/Abstract] OR inflammatory neuropath*[Title/Abstract] OR polyradiculoneuropathy[MeSH Terms] OR polyneuropathies[MeSH Terms] OR guillain barre syndrome[Title/Abstract] OR Guillain-Barre Syndrome[MeSH Terms] |
| 2                                                                                                                                                 | Intervención    | Diagnostic criteri*[TIAB] OR "Clinical score"[TIAB]                                                                                                                                                                                            |
| 3                                                                                                                                                 | Comparador      | -                                                                                                                                                                                                                                              |
| 4                                                                                                                                                 | Tipo de estudio | Revisión sistemática o Meta-análisis, ensayos clínicos aleatorizados, observacionales.                                                                                                                                                         |
| 5                                                                                                                                                 | Desenlace       | Tasa de detección, perfil diagnóstico (sensibilidad, especificidad, VPP, VPN)                                                                                                                                                                  |
|                                                                                                                                                   | Término final   | #1 AND #2                                                                                                                                                                                                                                      |

|                                                                                                                                                   |                 |                                                                                                                                                                                                |
|---------------------------------------------------------------------------------------------------------------------------------------------------|-----------------|------------------------------------------------------------------------------------------------------------------------------------------------------------------------------------------------|
| Base de datos: CENTRAL                                                                                                                            |                 |                                                                                                                                                                                                |
| Fecha de búsqueda: mayo 2018                                                                                                                      |                 |                                                                                                                                                                                                |
| Filtros: Fecha de publicación desde: Inicio de los tiempos, Revisión sistemática o Meta-análisis, ensayos clínicos aleatorizados, observacionales |                 |                                                                                                                                                                                                |
|                                                                                                                                                   | Descripción     | Término                                                                                                                                                                                        |
| 1                                                                                                                                                 | Población       | inflammatory polyneuropath*:ti,ab OR inflammatory neuropath*:ti,ab OR polyradiculoneuropathy:ti,ab OR polyneuropathies: Mesh OR guillain barre syndrome:ti,ab OR Guillain-Barre Syndrome: Mesh |
| 2                                                                                                                                                 | Intervención    | Diagnostic criteri*:ti,ab OR "Clinical score":ti,ab                                                                                                                                            |
| 3                                                                                                                                                 | Comparador      | -                                                                                                                                                                                              |
| 4                                                                                                                                                 | Tipo de estudio | Revisión sistemática o Meta-análisis, ensayos clínicos aleatorizados, observacionales                                                                                                          |
| 5                                                                                                                                                 | Desenlace       | Tasa de detección, perfil diagnóstico (sensibilidad, especificidad, VPP, VPN)                                                                                                                  |

|  |               |           |
|--|---------------|-----------|
|  | Término final | #1 AND #2 |
|--|---------------|-----------|

**Pregunta 2. En pacientes con Síndrome de Guillain-Barré ¿Es eficaz y seguro el tratamiento con plasmaféresis?**

|                                                                                   |                 |                                                                                                                                                                                                                                                |
|-----------------------------------------------------------------------------------|-----------------|------------------------------------------------------------------------------------------------------------------------------------------------------------------------------------------------------------------------------------------------|
| Base de datos: Medline                                                            |                 |                                                                                                                                                                                                                                                |
| Fecha de búsqueda: mayo 2018                                                      |                 |                                                                                                                                                                                                                                                |
| Filtros: Fecha de publicación desde:2008, Revisiones sistemáticas y meta-análisis |                 |                                                                                                                                                                                                                                                |
|                                                                                   | Descripción     | Término                                                                                                                                                                                                                                        |
| 1                                                                                 | Población       | inflammatory polyneuropath*[Title/Abstract] OR inflammatory neuropath*[Title/Abstract] OR polyradiculoneuropathy[MeSH Terms] OR polyneuropathies[MeSH Terms] OR guillain barre syndrome[Title/Abstract] OR Guillain-Barre Syndrome[MeSH Terms] |
| 2                                                                                 | Intervención    | plasmapheresis[Title/Abstract] OR plasmapheresis[MeSH Terms] OR Plasma exchange[Title/Abstract] OR Plasma Exchange[MeSH Terms]                                                                                                                 |
| 3                                                                                 | Comparador      | Se seleccionó manualmente                                                                                                                                                                                                                      |
| 4                                                                                 | Tipo de estudio | Revisión sistemática o Meta-análisis                                                                                                                                                                                                           |
| 5                                                                                 | Desenlace       | Eficacia, Seguridad, mejoría de grado de discapacidad, caminar, necesidad de ventilador mecánico, fuerza muscular, recaída, muerte e infección                                                                                                 |
|                                                                                   | Término final   | #1 AND #2                                                                                                                                                                                                                                      |

|                                                                                   |                 |                                                                                                                                                                                 |
|-----------------------------------------------------------------------------------|-----------------|---------------------------------------------------------------------------------------------------------------------------------------------------------------------------------|
| Base de datos: CENTRAL                                                            |                 |                                                                                                                                                                                 |
| Fecha de búsqueda: mayo 2018                                                      |                 |                                                                                                                                                                                 |
| Filtros: Fecha de publicación desde:2008, Revisiones sistemáticas y meta-análisis |                 |                                                                                                                                                                                 |
|                                                                                   | Descripción     | Término                                                                                                                                                                         |
| 1                                                                                 | Población       | Guillain-Barre Syndrome/ OR polyradiculoneuropathy/ OR polyneuropathies/ OR inflammatory polyneuropath* TI.AB OR inflammatory neuropath* TI.AB OR guillain barre syndrome TI.AB |
| 2                                                                                 | Intervención    | Plasma Exchange/ OR plasmapheresis/ OR plasmapheresis TI.AB OR Plasma exchange TI.AB                                                                                            |
| 3                                                                                 | Comparador      | Se seleccionó manualmente                                                                                                                                                       |
| 4                                                                                 | Tipo de estudio | Revisión sistemática o Meta-análisis                                                                                                                                            |

|   |               |                                                                                                                                                |
|---|---------------|------------------------------------------------------------------------------------------------------------------------------------------------|
| 5 | Desenlace     | Eficacia, Seguridad, mejoría de grado de discapacidad, caminar, necesidad de ventilador mecánico, fuerza muscular, recaída, muerte e infección |
|   | Término final | #1 AND #2                                                                                                                                      |

**Pregunta 3. En pacientes con Síndrome de Guillain-Barré ¿Es eficaz y seguro el tratamiento con inmunoglobulina?**

|                                                                                                                      |                 |                                                                                                                                                                                                                                                |
|----------------------------------------------------------------------------------------------------------------------|-----------------|------------------------------------------------------------------------------------------------------------------------------------------------------------------------------------------------------------------------------------------------|
| Base de datos: Medline                                                                                               |                 |                                                                                                                                                                                                                                                |
| Fecha de búsqueda: mayo 2018                                                                                         |                 |                                                                                                                                                                                                                                                |
| Filtros: Fecha de publicación desde: Inicio de los tiempos, Revisiones sistemáticas y ensayos clínicos aleatorizados |                 |                                                                                                                                                                                                                                                |
|                                                                                                                      | Descripción     | Término                                                                                                                                                                                                                                        |
| 1                                                                                                                    | Población       | inflammatory polyneuropath*[Title/Abstract] OR inflammatory neuropath*[Title/Abstract] OR polyradiculoneuropathy[MeSH Terms] OR polyneuropathies[MeSH Terms] OR guillain barre syndrome[Title/Abstract] OR Guillain-Barre Syndrome[MeSH Terms] |
| 2                                                                                                                    | Intervención    | intravenous immunoglobulin*[TIAB] OR "Immunoglobulins, Intravenous"[MESH] OR "ivig"[TIAB]OR intra venous immunoglobulin*[TIAB]                                                                                                                 |
| 3                                                                                                                    | Comparador      | plasmapheresis[Title/Abstract] OR plasmapheresis[MeSH Terms] OR Plasma exchange[Title/Abstract] OR Plasma Exchange[MeSH Terms]                                                                                                                 |
| 4                                                                                                                    | Tipo de estudio | Revisión sistemática o Meta-análisis                                                                                                                                                                                                           |
| 5                                                                                                                    | Desenlace       | Eficacia, Seguridad, mejoría de grado de discapacidad, caminar, necesidad de ventilador mecánico, fuerza muscular, recaída, muerte e infección                                                                                                 |
|                                                                                                                      | Término final   | #1 AND #2 AND #3                                                                                                                                                                                                                               |

|                                                                                                                      |             |                                                                                                                                                                                                |
|----------------------------------------------------------------------------------------------------------------------|-------------|------------------------------------------------------------------------------------------------------------------------------------------------------------------------------------------------|
| Base de datos: CENTRAL                                                                                               |             |                                                                                                                                                                                                |
| Fecha de búsqueda: mayo 2018                                                                                         |             |                                                                                                                                                                                                |
| Filtros: Fecha de publicación desde: Inicio de los tiempos, Revisiones sistemáticas y ensayos clínicos aleatorizados |             |                                                                                                                                                                                                |
|                                                                                                                      | Descripción | Término                                                                                                                                                                                        |
| 1                                                                                                                    | Población   | inflammatory polyneuropath*:ti,ab OR inflammatory neuropath*:ti,ab OR polyradiculoneuropathy:ti,ab OR polyneuropathies: Mesh OR guillain barre syndrome:ti,ab OR Guillain-Barre Syndrome: Mesh |

|   |                 |                                                                                                                                                |
|---|-----------------|------------------------------------------------------------------------------------------------------------------------------------------------|
| 2 | Intervención    | intravenous immunoglobulin*:ti,ab OR "Immunoglobulins, Intravenous": Mesh OR "ivig":ti,ab OR intra venous immunoglobulin*:ti,ab                |
| 3 | Comparador      | Plasmapheresis:ti,ab OR plasmapheresis:Mesh OR Plasma exchange:ti,ab OR Plasma Exchange:Mesh                                                   |
| 4 | Tipo de estudio | Revisión sistemática o Meta-análisis                                                                                                           |
| 5 | Desenlace       | Eficacia, Seguridad, mejoría de grado de discapacidad, caminar, necesidad de ventilador mecánico, fuerza muscular, recaída, muerte e infección |
|   | Término final   | #1 AND #2 AND #3                                                                                                                               |

**Pregunta 4. En pacientes con Síndrome de Guillain-Barré ¿Es eficaz y seguro el tratamiento con corticoides?**

|                                                                                   |                 |                                                                                                                                                                                                                                                                                                                                |
|-----------------------------------------------------------------------------------|-----------------|--------------------------------------------------------------------------------------------------------------------------------------------------------------------------------------------------------------------------------------------------------------------------------------------------------------------------------|
| Base de datos: Medline                                                            |                 |                                                                                                                                                                                                                                                                                                                                |
| Fecha de búsqueda: Mayo 2018                                                      |                 |                                                                                                                                                                                                                                                                                                                                |
| Filtros: Fecha de publicación desde: Los últimos 10 años, Revisiones sistemáticas |                 |                                                                                                                                                                                                                                                                                                                                |
|                                                                                   | Descripción     | Término                                                                                                                                                                                                                                                                                                                        |
| 1                                                                                 | Población       | inflammatory polyneuropath*[Title/Abstract] OR inflammatory neuropath*[Title/Abstract] OR polyradiculoneuropathy[MeSH Terms] OR polyneuropathies[MeSH Terms] OR guillain barre syndrome[Title/Abstract] OR Guillain-Barre Syndrome[MeSH Terms]                                                                                 |
| 2                                                                                 | Intervención    | "Steroids"[Mesh] OR Steroids[TIAB] OR "Glucocorticoids"[Mesh] OR Glucocorticoids[TIAB] OR Effect, Glucocorticoid[TIAB] OR "Cortisone"[Mesh] OR Cortisone[TIAB] OR "Prednisolone"[Mesh] OR Prednisolone[TIAB] OR "Prednisone"[Mesh] OR Prednisone[TIAB] OR "Anti-inflammatory Agents"[Mesh] OR "Anti-inflammatory Agents"[TIAB] |
| 3                                                                                 | Comparador      | Se seleccionó manualmente                                                                                                                                                                                                                                                                                                      |
| 4                                                                                 | Tipo de estudio | Systematic[sb] OR (randomized controlled trial[PT]) OR (controlled clinical trial[PT]) OR (clinical trial[PT]) OR (randomized[TIAB] OR randomised [TIAB]) or (placebo[TIAB] OR "Placebos"[Mesh]) OR (randomly[TIAB]) OR (trial[TIAB]) OR (groups [TIAB])                                                                       |
| 5                                                                                 | Desenlace       | "Death"[TIAB] OR "Adverse events"[TIAB] OR "Disability grade change"[TIAB] "Improvement by grades" [TIAB]                                                                                                                                                                                                                      |
|                                                                                   | Término final   | #1 AND #2 AND #4 AND #5                                                                                                                                                                                                                                                                                                        |

|  |    |  |
|--|----|--|
|  | 11 |  |
|--|----|--|

|                                                                                   |                  |                                                                                                                                                                                                                                                                                              |
|-----------------------------------------------------------------------------------|------------------|----------------------------------------------------------------------------------------------------------------------------------------------------------------------------------------------------------------------------------------------------------------------------------------------|
| Base de datos: CENTRAL                                                            |                  |                                                                                                                                                                                                                                                                                              |
| Fecha de búsqueda: Mayo 2018                                                      |                  |                                                                                                                                                                                                                                                                                              |
| Filtros: Fecha de publicación desde: Los últimos 10 años, Revisiones sistemáticas |                  |                                                                                                                                                                                                                                                                                              |
|                                                                                   | Descripción      | Término                                                                                                                                                                                                                                                                                      |
| 1                                                                                 | Población        | MESH DESCRIPTOR guillain barre syndrome EXPLODE ALL TREES or ("guillain barre syndrome"):ti,ab or (polyradiculoneuropath* or polyneuropathy* or "acute polyneuritis" or "acute polyradiculoneuritis"):ti,ab or (inflammatory near/5 neuropath* or inflammatory near/5 polyneuropathy*):ti,ab |
| 2                                                                                 | Intervención     | MESH DESCRIPTOR Steroids EXPLODE ALL TREES or MESH DESCRIPTOR or Anti-Inflammatory Agents EXPLODE ALL TREES or (steroid* or glucocortico*):ti,ab or ("anti-inflammatory agent*" or "anti-inflammatory agent*"):ti,ab or (prednisone* or prednisolone* or cortisone*):ti,ab                   |
| 3                                                                                 | Comparador       | no                                                                                                                                                                                                                                                                                           |
| 4                                                                                 | Tipo de estudio  | no                                                                                                                                                                                                                                                                                           |
| 5                                                                                 | Desenlace        | "Death"[TIAB] OR "Adverse events"[TIAB] OR "Disability grade change"[TIAB] "Improvement by $\geq 1$ grades" [TIAB]                                                                                                                                                                           |
|                                                                                   | Término final 11 | #1 AND #2 AND #5                                                                                                                                                                                                                                                                             |

**Pregunta 5. En pacientes con Síndrome de Guillain-Barré ¿Es eficaz y seguro el monitoreo continuo y los cuidados críticos?**

|                                                                                                                      |             |                                                                                                                                                                                                                                                |
|----------------------------------------------------------------------------------------------------------------------|-------------|------------------------------------------------------------------------------------------------------------------------------------------------------------------------------------------------------------------------------------------------|
| Base de datos: Medline                                                                                               |             |                                                                                                                                                                                                                                                |
| Fecha de búsqueda: mayo 2018                                                                                         |             |                                                                                                                                                                                                                                                |
| Filtros: Fecha de publicación desde: Inicio de los tiempos, Revisiones sistemáticas y ensayos clínicos aleatorizados |             |                                                                                                                                                                                                                                                |
|                                                                                                                      | Descripción | Término                                                                                                                                                                                                                                        |
| 1                                                                                                                    | Población   | inflammatory polyneuropath*[Title/Abstract] OR inflammatory neuropath*[Title/Abstract] OR polyradiculoneuropathy[MeSH Terms] OR polyneuropathies[MeSH Terms] OR guillain barre syndrome[Title/Abstract] OR Guillain-Barre Syndrome[MeSH Terms] |

|   |                 |                                                                                                                                                                           |
|---|-----------------|---------------------------------------------------------------------------------------------------------------------------------------------------------------------------|
| 2 | Intervención    | critical care[MeSH Terms] OR Hemodynamic Monitoring[MeSH Terms] OR Monitoring, Physiologic[MeSH Terms] OR critical care[Title/Abstract] OR intensive care[Title/Abstract] |
| 3 | Comparador      | supportive care[Title/Abstract]) OR inpatient hospital monitoring[Title/Abstract]                                                                                         |
| 4 | Tipo de estudio | Observacionales, Revisión sistemática o Meta-análisis                                                                                                                     |
| 5 | Desenlace       | Mortalidad                                                                                                                                                                |
|   | Término final   | #1 AND ( #2 OR #3)                                                                                                                                                        |

|                                                                                                                      |                 |                                                                                                                                                                                 |
|----------------------------------------------------------------------------------------------------------------------|-----------------|---------------------------------------------------------------------------------------------------------------------------------------------------------------------------------|
| Base de datos: CENTRAL                                                                                               |                 |                                                                                                                                                                                 |
| Fecha de búsqueda: mayo 2018                                                                                         |                 |                                                                                                                                                                                 |
| Filtros: Fecha de publicación desde: Inicio de los tiempos, Revisiones sistemáticas y ensayos clínicos aleatorizados |                 |                                                                                                                                                                                 |
|                                                                                                                      | Descripción     | Término                                                                                                                                                                         |
| 1                                                                                                                    | Población       | inflammatory polyneuropath* TI.AB OR inflammatory neuropath* TI.AB OR polyradiculoneuropathy/ OR polyneuropathies/ OR guillain barre syndrome TI.AB OR Guillain-Barre Syndrome/ |
| 2                                                                                                                    | Intervención    | critical care/ OR Hemodynamic Monitoring/ OR Monitoring, Physiologic/ OR critical care TI.AB OR intensive care TI.AB                                                            |
| 3                                                                                                                    | Comparador      | supportive care TI.AB OR inpatient hospital monitoring TI.AB                                                                                                                    |
| 4                                                                                                                    | Tipo de estudio | Observacionales, Revisión sistemática o Meta-análisis                                                                                                                           |
| 5                                                                                                                    | Desenlace       | Mortalidad                                                                                                                                                                      |
|                                                                                                                      | Término final   | #1 AND ( #2 OR #3)                                                                                                                                                              |

**Pregunta 6. En pacientes con Síndrome de Guillain-Barré ¿Es eficaz y seguro el tratamiento multidisciplinario y de rehabilitación?**

|                                                                                    |             |                                                                                                 |
|------------------------------------------------------------------------------------|-------------|-------------------------------------------------------------------------------------------------|
| Base de datos: Medline                                                             |             |                                                                                                 |
| Fecha de búsqueda: mayo 2018                                                       |             |                                                                                                 |
| Filtros: Fecha de publicación desde: 2008, Revisiones sistemáticas y meta-análisis |             |                                                                                                 |
|                                                                                    | Descripción | Término                                                                                         |
| 1                                                                                  | Población   | ((((inflammatory polyneuropath*[Title/Abstract]) OR inflammatory neuropath*[Title/Abstract]) OR |

|   |                 |                                                                                                                                                                                                                                                                                                                                                                                                                                                                                                                                                                                                                                                     |
|---|-----------------|-----------------------------------------------------------------------------------------------------------------------------------------------------------------------------------------------------------------------------------------------------------------------------------------------------------------------------------------------------------------------------------------------------------------------------------------------------------------------------------------------------------------------------------------------------------------------------------------------------------------------------------------------------|
|   |                 | ((polyradiculoneuropathy[MeSH Terms]) OR polyneuropathies[MeSH Terms])) OR ((guillain barre syndrome[Title/Abstract]) OR Guillain-Barre Syndrome[MeSH Terms]))))                                                                                                                                                                                                                                                                                                                                                                                                                                                                                    |
| 2 | Intervención    | ((((((((((((((ambulatory care[Title/Abstract] OR rehabilitation[Title/Abstract]) OR hospitalization[Title/Abstract]) OR Physical Therapy Modalities[Title/Abstract]) OR home care services[Title/Abstract]) OR hospital-based[Title/Abstract]) OR inpatients[Title/Abstract]) OR outpatients[Title/Abstract]) OR multidisciplinary[Title/Abstract]) OR interdisciplinary[Title/Abstract]) OR integrated to multimodal[Title/Abstract]) OR cognitive therapy[Title/Abstract]) OR Behavior Therapy[Title/Abstract]) OR Social Work[Title/Abstract]) OR Dietetics[Title/Abstract]) OR Dietary Services [Title/Abstract]) OR Counseling[Title/Abstract] |
| 3 | Comparador      | Se seleccionó manualmente                                                                                                                                                                                                                                                                                                                                                                                                                                                                                                                                                                                                                           |
| 4 | Tipo de estudio | Revisión sistemática o Meta-análisis                                                                                                                                                                                                                                                                                                                                                                                                                                                                                                                                                                                                                |
| 5 | Desenlace       | Limitación de la actividad < 12 meses, Calidad de vida <12 meses                                                                                                                                                                                                                                                                                                                                                                                                                                                                                                                                                                                    |
|   | Término final   | #1 AND #2                                                                                                                                                                                                                                                                                                                                                                                                                                                                                                                                                                                                                                           |

|                                                                                    |              |                                                                                                                                                                                                                                                                                                                                                 |
|------------------------------------------------------------------------------------|--------------|-------------------------------------------------------------------------------------------------------------------------------------------------------------------------------------------------------------------------------------------------------------------------------------------------------------------------------------------------|
| Base de datos: CENTRAL                                                             |              |                                                                                                                                                                                                                                                                                                                                                 |
| Fecha de búsqueda: mayo 2018                                                       |              |                                                                                                                                                                                                                                                                                                                                                 |
| Filtros: Fecha de publicación desde: 2008, Revisiones sistemáticas y meta-análisis |              |                                                                                                                                                                                                                                                                                                                                                 |
|                                                                                    | Descripción  | Término                                                                                                                                                                                                                                                                                                                                         |
| 1                                                                                  | Población    | Guillain-Barre Syndrome/ OR polyradiculoneuropathy/ OR polyneuropathies/ OR inflammatory polyneuropath* TI.AB OR inflammatory neuropath* TI.AB OR guillain barre syndrome TI.AB                                                                                                                                                                 |
| 2                                                                                  | Intervención | ambulatory care TI.AB OR rehabilitation TI.AB OR hospitalization TI.AB OR Physical Therapy Modalities TI.AB OR home care services TI.AB OR hospital-based TI.AB OR inpatients TI.AB OR outpatients TI.AB OR multidisciplinary TI.AB OR interdisciplinary TI.AB OR integrated to multimodal TI.AB OR cognitive therapy TI.AB OR Behavior Therapy |



|   |                 |                                                                                             |
|---|-----------------|---------------------------------------------------------------------------------------------|
|   |                 | TI.AB OR Social Work TI.AB OR Dietetics TI.AB OR Dietary Services TI.AB OR Counseling TI.AB |
| 3 | Comparador      | Se seleccionó manualmente                                                                   |
| 4 | Tipo de estudio | Revisión sistemática o Meta-análisis                                                        |
| 5 | Desenlace       | Limitación de la actividad < 12 meses, Calidad de vida <12 meses                            |
|   | Término final   | #1 AND #2                                                                                   |

### Material suplementario 3: Tablas de perfiles de evidencia por pregunta clínica

**Pregunta 1. En pacientes con sospecha de Síndrome de Guillain-Barré ¿Cuáles son los criterios diagnósticos y su utilidad?**

| <b>Criterios diagnósticos de Brighton comparado con no usarlos para el diagnóstico de Síndrome de Guillain-Barré</b>                                    |                                       |                                     |                                 |                                      |                                                                       |
|---------------------------------------------------------------------------------------------------------------------------------------------------------|---------------------------------------|-------------------------------------|---------------------------------|--------------------------------------|-----------------------------------------------------------------------|
| <b>Bibliografía:</b> Mateen et al. Guillain–Barré Syndrome in India: Population-based validation of the Brighton criteria. Vaccine 29 (2011) 9697–9701. |                                       |                                     |                                 |                                      |                                                                       |
| <b>Desenlaces</b>                                                                                                                                       | <b>Nº de participantes (estudios)</b> | <b>Calidad de evidencia (GRADE)</b> | <b>Efecto relativo (95% CI)</b> | <b>Efectos absolutos anticipados</b> |                                                                       |
|                                                                                                                                                         |                                       |                                     |                                 | <b>Riesgo con no usarlos</b>         | <b>La diferencia de riesgo con criterios diagnósticos de Brighton</b> |
| Tasa de detección - Nivel de certeza diagnóstica 1 de Brighton                                                                                          | 79<br>(1 estudio observacional )      | ⊕○○○<br>MUY BAJA <sup>a</sup>       | no estimable                    | 0 por 1,000                          | <b>620 más por 1,000</b><br>(504 más a 724 más)                       |
| Tasa de detección - Nivel de certeza diagnóstica 2 de Brighton                                                                                          | 79<br>(1 estudio observacional )      | ⊕○○○<br>MUY BAJA <sup>a</sup>       | no estimable                    | 0 por 1,000                          | <b>835 más por 1,000</b><br>(735 más a 909 más)                       |
| Tasa de detección - Nivel de certeza diagnóstica 3 de Brighton                                                                                          | 79<br>(1 estudio observacional )      | ⊕○○○<br>MUY BAJA <sup>a</sup>       | no estimable                    | 0 por 1,000                          | <b>861 más por 1,000</b><br>(765 más a 928 más)                       |

**El riesgo en el grupo de intervención** (y su intervalo de confianza del 95%) se basa en el riesgo asumido en el grupo de comparación y en el **efecto relativo** de la intervención (y su intervalo de confianza del 95%).

**CI:** Intervalo de confianza

Explicaciones

a. Presencia de "elevado riesgo de sesgo" en sesgos de selección, performance y detección

**Pregunta 2. En pacientes con Síndrome de Guillain-Barré ¿Es eficaz y seguro el tratamiento con plasmaféresis?**

| <b>Plasmaféresis comparado con no hacerlo (placebo o tratamiento estándar) para pacientes con Síndrome de Guillain-Barré</b>                                    |                                                       |                                     |                                 |                                                               |                                                       |
|-----------------------------------------------------------------------------------------------------------------------------------------------------------------|-------------------------------------------------------|-------------------------------------|---------------------------------|---------------------------------------------------------------|-------------------------------------------------------|
| <b>Bibliografía:</b> Chevret S, Hughes RA, Annane D. Plasma exchange for Guillain-Barre syndrome. The Cochrane database of systematic reviews. 2017;2:Cd001798. |                                                       |                                     |                                 |                                                               |                                                       |
| <b>Desenlaces</b>                                                                                                                                               | <b>Nº de participantes (estudios)</b>                 | <b>Calidad de evidencia (GRADE)</b> | <b>Efecto relativo (95% CI)</b> | <b>Efectos absolutos anticipados</b>                          |                                                       |
|                                                                                                                                                                 |                                                       |                                     |                                 | <b>Riesgo con no hacerlo (placebo o tratamiento estándar)</b> | <b>La diferencia de riesgo con Plasmaféresis</b>      |
| Caminar con ayuda después de 4 semanas                                                                                                                          | 349<br>(3 Experimentos controlados aleatorios [ECAs]) | ⊕⊕○○<br>BAJA <sup>a,b</sup>         | <b>RR 1.60</b><br>(1.19 a 2.15) | 266 por 1,000                                                 | <b>159 más por 1,000</b><br>(50 más a 305 más )       |
| Mejora en 1 grado después de 4 semanas                                                                                                                          | 623<br>(5 Experimentos controlados aleatorios [ECAs]) | ⊕⊕⊕○<br>MODERADO <sup>a</sup>       | <b>RR 1.64</b><br>(1.37 a 1.96) | 349 por 1,000                                                 | <b>223 más por 1,000</b><br>(129 más a 335 más )      |
| Caminar sin ayuda después de 4 semanas                                                                                                                          | 349<br>(3 Experimentos controlados aleatorios [ECAs]) | ⊕⊕○○<br>BAJA <sup>a,b</sup>         | <b>RR 1.72</b><br>(1.06 a 2.79) | 119 por 1,000                                                 | <b>85 más por 1,000</b><br>(7 más a 212 más )         |
| Ventilación Mecánica después de 4 semanas                                                                                                                       | 623<br>(5 Experimentos controlados aleatorios [ECAs]) | ⊕⊕⊕○<br>MODERADO <sup>a</sup>       | <b>RR 0.53</b><br>(0.39 a 0.74) | 270 por 1,000                                                 | <b>127 menos por 1,000</b><br>(165 menos a 70 menos ) |
| Recuperación completa de la fuerza muscular después de 1 año                                                                                                    | 404<br>(5 Experimentos controlados aleatorios [ECAs]) | ⊕⊕○○<br>BAJA <sup>a,b</sup>         | <b>RR 1.24</b><br>(1.07 a 1.45) | 546 por 1,000                                                 | <b>131 más por 1,000</b><br>(38 más a 246 más )       |

|                                                                                                                                                                                                                                                                                                       |                                                       |                                 |                                 |               |                                                    |
|-------------------------------------------------------------------------------------------------------------------------------------------------------------------------------------------------------------------------------------------------------------------------------------------------------|-------------------------------------------------------|---------------------------------|---------------------------------|---------------|----------------------------------------------------|
| Mortalidad después de 1 año                                                                                                                                                                                                                                                                           | 649<br>(6 Experimentos controlados aleatorios [ECAs]) | ⊕○○○<br>MUY BAJA <sup>a,c</sup> | <b>RR 0.86</b><br>(0.45 a 1.65) | 55 por 1,000  | <b>8 menos por 1,000</b><br>(30 menos a 36 más )   |
| Secuelas motoras severas luego de 1 año                                                                                                                                                                                                                                                               | 649<br>(6 Experimentos controlados aleatorios [ECAs]) | ⊕⊕○○<br>BAJA <sup>a,d</sup>     | <b>RR 0.65</b><br>(0.44 a 0.96) | 168 por 1,000 | <b>59 menos por 1,000</b><br>(94 menos a 7 menos ) |
| Recaídas durante el tiempo de seguimiento luego 1 año                                                                                                                                                                                                                                                 | 649<br>(6 Experimentos controlados aleatorios [ECAs]) | ⊕⊕○○<br>BAJA <sup>a,b</sup>     | <b>RR 2.89</b><br>(1.05 a 7.93) | 12 por 1,000  | <b>23 más por 1,000</b><br>(1 más a 85 más )       |
| Infección severa durante la estancia hospitalaria                                                                                                                                                                                                                                                     | 556<br>(3 Experimentos controlados aleatorios [ECAs]) | ⊕○○○<br>MUY BAJA <sup>c,e</sup> | <b>RR 0.91</b><br>(0.73 a 1.13) | 371 por 1,000 | <b>33 menos por 1,000</b><br>(100 menos a 48 más ) |
| <b>El riesgo en el grupo de intervención</b> (y su intervalo de confianza del 95%) se basa en el riesgo asumido en el grupo de comparación y en el <b>efecto relativo</b> de la intervención (y su intervalo de confianza del 95%).<br><b>CI:</b> Intervalo de confianza ; <b>RR:</b> Razón de riesgo |                                                       |                                 |                                 |               |                                                    |

#### Explicaciones

- a. Presencia de "elevado riesgo de sesgo" en sesgos de selección, performance y detección
- b. El IC95% incluyó 1.25
- c. El IC95% incluyó el 0.75 y el 1.25
- d. El IC95% incluye el 0.75
- e. Presencia de "elevado riesgo de sesgo" en sesgos de performance y detección

### Pregunta 3. En pacientes con Síndrome de Guillain-Barré ¿Es eficaz y seguro el tratamiento con inmunoglobulina?

| <b>Inmunoglobulina comparado con Plasmaferésis para pacientes con Síndrome de Guillain-Barré</b>                                                                                                                      |                                                       |                                     |                                 |                                                                  |                                                         |
|-----------------------------------------------------------------------------------------------------------------------------------------------------------------------------------------------------------------------|-------------------------------------------------------|-------------------------------------|---------------------------------|------------------------------------------------------------------|---------------------------------------------------------|
| <b>Bibliografía:</b> Hughes RAC, Swan AV, Raphaël J-C, Annane D, van Koningsveld R, van Doorn PA. Immunotherapy for Guillain-Barré syndrome: a systematic review. Brain: a journal of neurology. 2007;130(9):2245-57. |                                                       |                                     |                                 |                                                                  |                                                         |
| <b>Desenlaces</b>                                                                                                                                                                                                     | <b>Nº de participantes (estudios)</b>                 | <b>Calidad de evidencia (GRADE)</b> | <b>Efecto relativo (95% CI)</b> | <b>Efectos absolutos anticipados</b>                             |                                                         |
|                                                                                                                                                                                                                       |                                                       |                                     |                                 | <b>Riesgo con Plasmaféresis</b>                                  | <b>La diferencia de riesgo con Inmunoglobulina</b>      |
| Cambios en discapacidad a las 4 semanas                                                                                                                                                                               | 536<br>(5 Experimentos controlados aleatorios [ECAs]) | ⊕⊕⊕○<br>MODERADO <sup>a</sup>       | -                               | La media cambios en discapacidad a las 4 semanas era <b>0 SD</b> | <b>MD 0.02 SD menor</b><br>(0.25 menor a 0.2 más alto.) |
| Mejora en 1 o más grados de discapacidad a las 4 semanas                                                                                                                                                              | 567<br>(6 Experimentos controlados aleatorios [ECAs]) | ⊕⊕⊕○<br>MODERADO <sup>a</sup>       | <b>RR 1.08</b><br>(0.94 a 1.23) | 562 por 1,000                                                    | <b>45 más por 1,000</b><br>(34 menos a 129 más )        |
| Mortalidad                                                                                                                                                                                                            | 623<br>(7 Experimentos controlados aleatorios [ECAs]) | ⊕⊕⊕○<br>MODERADO <sup>b</sup>       | <b>RR 0.78</b><br>(0.31 a 1.95) | 29 por 1,000                                                     | <b>6 menos por 1,000</b><br>(20 menos a 28 más )        |
| Muerte o discapacidad a los 12 meses                                                                                                                                                                                  | 243<br>(1 ECA (experimento controlado aleatorizado))  | ⊕⊕⊕○<br>MODERADO <sup>b</sup>       | <b>RR 0.98</b><br>(0.55 a 1.72) | 167 por 1,000                                                    | <b>3 menos por 1,000</b><br>(75 menos a 120 más )       |
| Recaída o fluctuación relacionada con el tratamiento.                                                                                                                                                                 | 445<br>(3 Experimentos controlados aleatorios [ECAs]) | ⊕⊕⊕○<br>MODERADO <sup>b</sup>       | <b>RR 0.89</b><br>(0.42 a 1.89) | 60 por 1,000                                                     | <b>7 menos por 1,000</b><br>(35 menos a 53 más )        |

|                                                                                                                                                                                                                                                                                                                                               |                                                       |                               |                                 |               |                                                       |
|-----------------------------------------------------------------------------------------------------------------------------------------------------------------------------------------------------------------------------------------------------------------------------------------------------------------------------------------------|-------------------------------------------------------|-------------------------------|---------------------------------|---------------|-------------------------------------------------------|
| Discontinuar tratamiento                                                                                                                                                                                                                                                                                                                      | 495<br>(4 Experimentos controlados aleatorios [ECAs]) | ⊕⊕⊕⊕<br>ALTA                  | <b>RR 0.14</b><br>(0.05 a 0.36) | 128 por 1,000 | <b>110 menos por 1,000</b><br>(122 menos a 82 menos ) |
| Eventos adversos atribuidos al tratamiento                                                                                                                                                                                                                                                                                                    | 388<br>(4 Experimentos controlados aleatorios [ECAs]) | ⊕⊕⊕○<br>MODERADO <sup>b</sup> | <b>RR 0.84</b><br>(0.54 a 1.30) | 151 por 1,000 | <b>24 menos por 1,000</b><br>(69 menos a 45 más )     |
| <p><b>El riesgo en el grupo de intervención</b> (y su intervalo de confianza del 95%) se basa en el riesgo asumido en el grupo de comparación y en el <b>efecto relativo</b> de la intervención (y su intervalo de confianza del 95%).</p> <p><b>CI:</b> Intervalo de confianza ; <b>MD:</b> Diferencia media; <b>RR:</b> Razón de riesgo</p> |                                                       |                               |                                 |               |                                                       |

Explicaciones

a. No adecuado cegamiento de los pacientes para todos los desenlaces en 4 de los 5 estudios (excepción PSGBS 1997)

b. IC incluye 0.75 y 1.25

**Pregunta 4. En pacientes con Síndrome de Guillain-Barré ¿Es eficaz y seguro el tratamiento con corticoides?**

| <b>Corticoides comparado con manejo estándar o placebo para pacientes con Síndrome de Guillain-Barré</b>                                                                          |                                                       |                                     |                                 |                                                                                      |                                                                    |
|-----------------------------------------------------------------------------------------------------------------------------------------------------------------------------------|-------------------------------------------------------|-------------------------------------|---------------------------------|--------------------------------------------------------------------------------------|--------------------------------------------------------------------|
| <b>Bibliografía:</b> Hughes RA, Brassington R, Gunn AA, van Doorn PA. Corticosteroids for Guillain-Barre syndrome. The Cochrane database of systematic reviews. 2016;10:CD001446. |                                                       |                                     |                                 |                                                                                      |                                                                    |
| <b>Desenlaces</b>                                                                                                                                                                 | <b>Nº de participantes (estudios)</b>                 | <b>Calidad de evidencia (GRADE)</b> | <b>Efecto relativo (95% CI)</b> | <b>Efectos absolutos anticipados</b>                                                 |                                                                    |
|                                                                                                                                                                                   |                                                       |                                     |                                 | <b>Riesgo con manejo estándar o placebo</b>                                          | <b>La diferencia de riesgo con Corticoides</b>                     |
| Cambio en el grado de discapacidad. Seguimiento: media 4 semanas                                                                                                                  | 587<br>(6 Experimentos controlados aleatorios [ECAs]) | ⊕⊕○○<br>BAJA <sup>a,b</sup>         | -                               | La media cambio en el grado de discapacidad era <b>0</b> SD                          | mean <b>0.36 SD más alto.</b><br>(0.88 más alto. a 0.16 menor )    |
| Cambio en el grado de discapacidad de corticoides orales. Seguimiento: media 4 semanas                                                                                            | 120<br>(4 Experimentos controlados aleatorios [ECAs]) | ⊕⊕⊕○<br>MODERADO <sup>c</sup>       | -                               | La media cambio en el grado de discapacidad de corticoides orales era <b>0</b> SD    | mean <b>0.82 SD más alto.</b><br>(0.17 más alto. a 1.47 más alto.) |
| Cambio en el grado de discapacidad de corticoides intravenosos. Seguimiento: media 4 semanas                                                                                      | (2 Experimentos controlados aleatorios [ECAs])        | ⊕⊕○○<br>BAJA <sup>d</sup>           | -                               | La media cambio en el grado de discapacidad de corticoides intravenosos era <b>0</b> | <b>0</b><br>(0 a 0 )                                               |
| Mejora en más de 1 grado.                                                                                                                                                         | 567<br>(5 Experimentos)                               | ⊕⊕⊕○<br>MODERADO                    | <b>RR 1.08</b><br>(0.93 a 1.24) | 543 por 1.000                                                                        | <b>43 más por 1.000</b>                                            |



|                                                                                                      |                                                       |                  |                          |               |                                                      |
|------------------------------------------------------------------------------------------------------|-------------------------------------------------------|------------------|--------------------------|---------------|------------------------------------------------------|
| Seguimiento: media 4 semanas                                                                         | controlados aleatorios [ECAs])                        |                  |                          |               | (38 menos a 130 más )                                |
| Muerte o discapacidad (incapacidad para caminar sin ayuda). Seguimiento: media 1 años                | 491<br>(3 Experimentos controlados aleatorios [ECAs]) | ⊕⊕⊕○<br>MODERADO | RR 1.51<br>(0.91 a 2.50) | 92 por 1.000  | <b>47 más por 1.000</b><br>(8 menos a 138 más )      |
| Muerte                                                                                               | 605<br>(7 Experimentos controlados aleatorios [ECAs]) | ⊕⊕⊕○<br>MODERADO | RR 1.28<br>(0.67 a 2.47) | 47 por 1.000  | <b>13 más por 1.000</b><br>(16 menos a 69 más )      |
| Eventos adversos específicos: Diabetes Mellitus que requiere insulina. Seguimiento: media 1 semanas  | 467<br>(2 Experimentos controlados aleatorios [ECAs]) | ⊕⊕⊕○<br>MODERADO | RR 2.21<br>(1.19 a 4.12) | 56 por 1.000  | <b>68 más por 1.000</b><br>(11 más a 176 más )       |
| Eventos adversos específicos: Hipertensión                                                           | 467<br>(2 Experimentos controlados aleatorios [ECAs]) | ⊕⊕⊕⊕<br>ALTA     | RR 0.15<br>(0.05 a 0.41) | 117 por 1.000 | <b>99 menos por 1.000</b><br>(111 menos a 69 menos ) |
| Efectos adversos específicos: Nueva infección tratada con antibióticos. Seguimiento: media 4 semanas | 467<br>(2 Experimentos controlados aleatorios [ECAs]) | ⊕⊕⊕○<br>MODERADO | RR 0.74<br>(0.52 a 1.04) | 260 por 1.000 | <b>68 menos por 1.000</b><br>(125 menos a 10 más )   |
| Efectos adversos específicos: Hemorragia gastrointestinales                                          | 467<br>(2 Experimentos controlados aleatorios [ECAs]) | ⊕⊕⊕○<br>MODERADO | RR 1.17<br>(0.36 a 3.78) | 22 por 1.000  | <b>4 más por 1.000</b><br>(14 menos a 60 más )       |

**El riesgo en el grupo de intervención** (y su intervalo de confianza del 95%) se basa en el riesgo asumido en el grupo de comparación y en el **efecto relativo** de la intervención (y su intervalo de confianza del 95%).

**CI:** Intervalo de confianza ; **RR:** Razón de riesgo

Explicaciones

- a. Heterogeneidad > 50%
- b. El IC 95% atraviesa por los puntos de imprecisión 0.75 y/o 1.25.
- c. Limitaciones en el diseño de los estudios: 3 ensayos tenían una ocultación inadecuada de la asignación y cegamiento inadecuado.
- d. Limitaciones en la designación e implementación de los ECA: en uno el intercambio de plasma se usó 10 veces en el grupo placebo pudiendo sesgar la eficacia del grupo con corticoides.

**Pregunta 5. En pacientes con Síndrome de Guillain-Barré ¿Es eficaz y seguro el monitoreo continuo y los cuidados críticos?**

| Hospitalización en unidad de cuidados intensivos neurológicos comparado con hospitalización en unidad de cuidados intensivos generales para Síndrome de Guillain-Barré con criterios de ingreso a unidad de cuidados intensivos                                                                                                          |                                |                                 |                                                                                                                                                                                                                                                                                                                                                                                                                                                     |                                                             |                                                                                           |
|------------------------------------------------------------------------------------------------------------------------------------------------------------------------------------------------------------------------------------------------------------------------------------------------------------------------------------------|--------------------------------|---------------------------------|-----------------------------------------------------------------------------------------------------------------------------------------------------------------------------------------------------------------------------------------------------------------------------------------------------------------------------------------------------------------------------------------------------------------------------------------------------|-------------------------------------------------------------|-------------------------------------------------------------------------------------------|
| Bibliografía: Damian MS, Ben-Shlomo Y, Howard R, Bellotti T, Harrison D, Griggs K, et al. The effect of secular trends and specialist neurocritical care on mortality for patients with intracerebral haemorrhage, myasthenia gravis and Guillain–Barré syndrome admitted to critical care. Intensive care medicine. 2013;39(8):1405-12. |                                |                                 |                                                                                                                                                                                                                                                                                                                                                                                                                                                     |                                                             |                                                                                           |
| Desenlaces                                                                                                                                                                                                                                                                                                                               | Nº de participantes (estudios) | Calidad de evidencia (GRADE)    | Efecto relativo (95% CI)                                                                                                                                                                                                                                                                                                                                                                                                                            | Efectos absolutos anticipados                               |                                                                                           |
|                                                                                                                                                                                                                                                                                                                                          |                                |                                 |                                                                                                                                                                                                                                                                                                                                                                                                                                                     | Riesgo con hospitalización en unidad de cuidados intensivos | La diferencia de riesgo con hospitalización en unidad de cuidados intensivos neurológicos |
| Mortalidad                                                                                                                                                                                                                                                                                                                               | (1 estudio observacional )     | ⊕○○○<br>MUY BAJA <sup>a,b</sup> | El OR para pacientes que estuvieron hospitalizados en unidad de cuidados intensivos generales comparado con los pacientes hospitalizados en unidad de cuidados intensivos neurológicos fue de 1.23 (IC95%: 0.81-1.87), y pacientes que estuvieron hospitalizados en unidad de cuidados intensivos con atención neurológica comparado con los pacientes hospitalizados en unidad de cuidados intensivos neurológicos fue de 1.44 (IC95%: 0.90-2.30), |                                                             |                                                                                           |
| El riesgo en el grupo de intervención (y su intervalo de confianza del 95%) se basa en el riesgo asumido en el grupo de comparación y en el efecto relativo de la intervención (y su intervalo de confianza del 95%).                                                                                                                    |                                |                                 |                                                                                                                                                                                                                                                                                                                                                                                                                                                     |                                                             |                                                                                           |
| CI: Intervalo de confianza                                                                                                                                                                                                                                                                                                               |                                |                                 |                                                                                                                                                                                                                                                                                                                                                                                                                                                     |                                                             |                                                                                           |

**Explicaciones**

a. La población incluyó pacientes con Hemorragia intracerebral, Miastenia Gravis y Síndrome de Guillain-Barré

b. El IC95% incluyó puntos de imprecisión 0.75 y/o 1.25

**Pregunta 6. En pacientes con Síndrome de Guillain-Barré ¿Es eficaz y seguro el tratamiento multidisciplinario y de rehabilitación?**

| <b>Tratamiento multidisciplinario comparado con ningún tratamiento para Síndrome de Guillain-Barré</b>                                                                                                                                                                                                                                                                                                           |                                |                                 |                                                                                                                                                                                                                                                                                                                                                                                                                                                       |                               |                                                            |
|------------------------------------------------------------------------------------------------------------------------------------------------------------------------------------------------------------------------------------------------------------------------------------------------------------------------------------------------------------------------------------------------------------------|--------------------------------|---------------------------------|-------------------------------------------------------------------------------------------------------------------------------------------------------------------------------------------------------------------------------------------------------------------------------------------------------------------------------------------------------------------------------------------------------------------------------------------------------|-------------------------------|------------------------------------------------------------|
| <b>Bibliografía:</b> Khan F, Ng L, Amatya B, Brand C, Turner-Stokes L. Multidisciplinary care for Guillain-Barre syndrome. The Cochrane database of systematic reviews. 2010(10):Cd008505.<br>Khan F, Amatya B. Rehabilitation interventions in patients with acute demyelinating inflammatory polyneuropathy: a systematic review. European journal of physical and rehabilitation medicine. 2012;48(3):507-22. |                                |                                 |                                                                                                                                                                                                                                                                                                                                                                                                                                                       |                               |                                                            |
| Desenlaces                                                                                                                                                                                                                                                                                                                                                                                                       | Nº de participantes (estudios) | Calidad de evidencia (GRADE)    | Efecto relativo (95% CI)                                                                                                                                                                                                                                                                                                                                                                                                                              | Efectos absolutos anticipados |                                                            |
|                                                                                                                                                                                                                                                                                                                                                                                                                  |                                |                                 |                                                                                                                                                                                                                                                                                                                                                                                                                                                       | Riesgo con ningún tratamiento | La diferencia de riesgo con tratamiento multidisciplinario |
| Limitación de la actividad <12 meses                                                                                                                                                                                                                                                                                                                                                                             | (4 estudios observacionales )  | ⊕○○○<br>MUY BAJA <sup>a,b</sup> | Demir et al. mostraron un incremento en los puntajes de la escala FIM desde la admisión al alta ( $33.2 \pm 12.7$ , $p = 0.001$ ) y a los 6 meses ( $20.9 \pm 13.4$ , $P = 0.001$ ); Meythaler et al. mostraron un incremento en los promedios de puntuación del FIM motor y cognitivo desde la admisión al alta de 15.7 y 6.9 puntos respectivamente; y Nicholas et al. mostraron un incremento del FIM de 53 a 85 puntos desde la admisión al alta. |                               |                                                            |
| Calidad de vida <12 meses                                                                                                                                                                                                                                                                                                                                                                                        | (1 estudio observacional )     | ⊕○○○<br>MUY BAJA <sup>a,b</sup> | Nicholas et al. demostraron mejoramiento de la calidad de vida a los 12 meses, evidenciada porque la escala (Environmental Status Scale) ( $n = 15$ ) disminuyó de 23 a 13, y la escala (Handicap                                                                                                                                                                                                                                                     |                               |                                                            |

|                                                                                                                                                                                                                                                                          |  |  |                                                                                                 |
|--------------------------------------------------------------------------------------------------------------------------------------------------------------------------------------------------------------------------------------------------------------------------|--|--|-------------------------------------------------------------------------------------------------|
|                                                                                                                                                                                                                                                                          |  |  | Assessment Scale) (n = 9) disminuyó de 19 a 10, lo que indica una reducción en la discapacidad. |
| <b>El riesgo en el grupo de intervención</b> (y su intervalo de confianza del 95%) se basa en el riesgo asumido en el grupo de comparación y en el <b>efecto relativo</b> de la intervención (y su intervalo de confianza del 95%).<br><b>CI:</b> Intervalo de confianza |  |  |                                                                                                 |

FIM: Functional Independence Measure

Explicaciones

- a. Riesgo de sesgo de selección
- b. Los estudios tienen muestras pequeñas

#### Material suplementario 4: Características clínicas del Síndrome de Guillain-Barré y sus subtipos

| Características clínicas del Síndrome de Guillain-Barré y sus subtipos |                                        |             |                  |
|------------------------------------------------------------------------|----------------------------------------|-------------|------------------|
|                                                                        | Características clínicas               |             |                  |
|                                                                        | Patrón de debilidad                    | Ataxia      | Hipersomnolencia |
| Síndrome de Guillain-Barré                                             |                                        |             |                  |
| Síndrome de Guillain-Barré clásico                                     | Cuatro extremidades                    | No o mínima | No               |
| Debilidad faríngeo - cervico - braquial                                | Bulbar, cervical y cuatro extremidades | No          | No               |
| Debilidad faríngea aguda                                               | Bulbar                                 | No          | No               |
| Síndrome de Guillain-Barré paraparéctica                               | Extremidades inferiores                | No          | No               |
| Debilidad bifacial con parestesias                                     | Facial                                 | No          | No               |
| Síndrome de Miller Fisher                                              |                                        |             |                  |
| Síndrome de Miller Fisher clásico                                      | Oftalmoplejia                          | Si          | No               |
| Oftalmoparesia aguda                                                   | Oftalmoplejia                          | No          | No               |
| Neuropatía atáxica aguda                                               | No debilidad                           | Si          | No               |
| Ptosia aguda                                                           | Ptosia                                 | No          | No               |
| Midriasis aguda                                                        | Midriasis paralítica                   | No          | No               |
| Encefalitis troncoencefálica de Bickerstaff                            | Oftalmoplejia                          | No          | Si               |
| Hipersomnolencia atáxica aguda                                         | No debilidad                           | Si          | Si               |

Tomado de: Creange A. Guillain-barre syndrome: 100 years on. Rev Neurol (Paris). 2016 Dec;172(12):770-774.

## Material suplementario 5: Características diagnósticas del Síndrome de Guillain-Barré

| <b>Características diagnósticas del Síndrome de Guillain-Barré</b>                                    |                                                                                                                                                                                                                                                                                                                                                                                                                                                                                                                                                                                                                                                                                                                                                                                                             |
|-------------------------------------------------------------------------------------------------------|-------------------------------------------------------------------------------------------------------------------------------------------------------------------------------------------------------------------------------------------------------------------------------------------------------------------------------------------------------------------------------------------------------------------------------------------------------------------------------------------------------------------------------------------------------------------------------------------------------------------------------------------------------------------------------------------------------------------------------------------------------------------------------------------------------------|
| <b>Características requeridas</b>                                                                     | <ul style="list-style-type: none"> <li>• Debilidad progresiva en extremidades inferiores y superiores (a veces inicialmente solo en miembros inferiores).</li> <li>• Arreflexia (o disminución de los reflejos osteotendinosos) en las extremidades con debilidad muscular.</li> </ul>                                                                                                                                                                                                                                                                                                                                                                                                                                                                                                                      |
| <b>Características que apoyan fuertemente el diagnóstico</b>                                          | <ul style="list-style-type: none"> <li>• Fase progresiva que dura días hasta 4 semanas (a menudo 2 semanas)</li> <li>• Simetría relativa de los signos y síntomas.</li> <li>• Síntomas sensitivos leves (no se encuentran presentes en la neuropatía motora axonal aguda).</li> <li>• Compromiso de nervios craneales, especialmente la debilidad bilateral de los músculos faciales.</li> <li>• Recuperación que comienza 2-4 semanas después de que cesa la progresión.</li> <li>• Disfunción autonómica.</li> <li>• Dolor (común).</li> <li>• Ausencia de fiebre al inicio del cuadro clínico.</li> <li>• Elevada concentración de proteína en el líquido cefalorraquídeo, con &lt; 50 células/μl (usualmente &lt; 5 células/μl).</li> <li>• Signos electrodiagnósticos consistentes con SGB.</li> </ul> |
| <b>Características que deberían generar dudas sobre el diagnóstico del Síndrome de Guillain-Barré</b> | <ul style="list-style-type: none"> <li>• Pleocitosis en LCR de células mononucleares o polimorfonucleares (&gt;50 células/μL)</li> <li>• Disfunción pulmonar severa con poca o ninguna debilidad en extremidades al inicio</li> <li>• Signos sensitivos severos con poca o ninguna debilidad de extremidades al inicio</li> <li>• Disfunción vesical o intestinal de inicio</li> <li>• Fiebre de inicio</li> <li>• Nivel sensitivo medular claro.</li> <li>• Asimetría marcada de la debilidad</li> <li>• Disfunción persistente vesical o intestinal</li> </ul>                                                                                                                                                                                                                                            |
| <b>Características que excluyen el diagnóstico</b>                                                    | <ul style="list-style-type: none"> <li>• Diagnóstico de botulismo, miastenia, poliomielitis o neuropatía tóxica;</li> <li>• Metabolismo de porfirina anormal;</li> <li>• Difteria reciente;</li> <li>• Síndrome puramente sensorial, sin debilidad.</li> </ul>                                                                                                                                                                                                                                                                                                                                                                                                                                                                                                                                              |
| <b>Estudios de conducción nerviosa</b>                                                                | <ul style="list-style-type: none"> <li>• Pueden ser útiles en la práctica clínica, pero en general no se requieren para el diagnóstico de SGB.</li> <li>• Necesario cumplir todos los criterios de Brighton para SGB</li> <li>• Esenciales para la clasificación de SGB en AIDP o AMAN</li> </ul>                                                                                                                                                                                                                                                                                                                                                                                                                                                                                                           |

|  |                                                                                                                                                                                                                                                                                                                                                                                                                                                                                                                                                                                                                                                                        |
|--|------------------------------------------------------------------------------------------------------------------------------------------------------------------------------------------------------------------------------------------------------------------------------------------------------------------------------------------------------------------------------------------------------------------------------------------------------------------------------------------------------------------------------------------------------------------------------------------------------------------------------------------------------------------------|
|  | <ul style="list-style-type: none"> <li>• AIDP: Características de desmielinización (disminución de la velocidad de conducción nerviosa motora, latencias distales motoras prolongadas, incremento de la latencia de la onda F, bloqueo de conducción y dispersión temporal)</li> <li>• AMAN: No características de desmielinización (se puede hallar una característica desmielinizante en un nervio, si la amplitud distal del PAMC es menos del 10% del límite inferior de normalidad; amplitud distal del PAMC es menos del 80% del límite inferior de normalidad en al menos dos nervios. Bloque de conducción motora transitoria puede estar presente.</li> </ul> |
|--|------------------------------------------------------------------------------------------------------------------------------------------------------------------------------------------------------------------------------------------------------------------------------------------------------------------------------------------------------------------------------------------------------------------------------------------------------------------------------------------------------------------------------------------------------------------------------------------------------------------------------------------------------------------------|

AIDP: Polineuropatía desmielinizante inflamatoria aguda; AMAN: Neuropatía axonal motora aguda; LCR: Líquido cefalorraquídeo; PAMC: Potencial de acción motora compuesto; SGB: Síndrome de Guillain-Barré

Tomado y modificado de: Willison HJ, Jacobs BC, van Doorn PA. Guillain-Barre syndrome. Lancet. 2016 Aug 13;388(10045):717-27.



## Material suplementario 6: Escala de severidad de Hughes

| Escala de discapacidad de Síndrome de Guillain-Barré – Hughes                                                                                                                                                                                                                                                                                                                                                                                                                        |
|--------------------------------------------------------------------------------------------------------------------------------------------------------------------------------------------------------------------------------------------------------------------------------------------------------------------------------------------------------------------------------------------------------------------------------------------------------------------------------------|
| <ol style="list-style-type: none"><li>0. Saludable</li><li>1. Síntomas o signos menores de neuropatía, pero capaz de realizar trabajo manual/correr</li><li>2. Capaz de caminar sin soporte (5 metros en espacio abierto) pero incapaz de realizar trabajo manual / correr.</li><li>3. Capaz de caminar con bastón andadera o soporte (5 metros en espacio abierto)</li><li>4. Confinado a cama o silla</li><li>5. Requerimiento de ventilación asistida</li><li>6. Muerte</li></ol> |
| Grados:<br>Leve: Clase 1 o 2 de Hughes<br>Moderado: Clase 3 de Hughes<br>Severo: Clase 4 o 5                                                                                                                                                                                                                                                                                                                                                                                         |

Tomado de: Hughes RA, Swan AV, Raphaël JC, Annane D, van Koningsveld R, van Doorn PA. Immunotherapy for Guillain-Barre syndrome: a systematic review. Brain. 2007 Sep;130(Pt 9):2245-57.

## Material suplementario 7: Criterios para ingreso a Unidad de Cuidados Intensivos

| Criterios para ingresar pacientes a UCI                                                                                                                                                                                                                                                                                                                                                                                                                                                                                          |
|----------------------------------------------------------------------------------------------------------------------------------------------------------------------------------------------------------------------------------------------------------------------------------------------------------------------------------------------------------------------------------------------------------------------------------------------------------------------------------------------------------------------------------|
| <ul style="list-style-type: none"><li>• Debilidad severa y rápidamente progresiva con/sin signos de disfunción respiratoria (capacidad vital &lt;20 ml/kg).</li><li>• Necesidad de ventilación artificial.</li><li>• Síntomas bulbares (dificultad para deglutir y hablar)</li><li>• Disfunción autonómica grave (marcada fluctuación en la presión arterial o frecuencia cardíaca).</li><li>• Alta probabilidad (&gt;50%) de requerir ventilación mecánica estimada mediante una escala validada (Ej. Score de EGRIS)</li></ul> |

UCI: Unidad de Cuidados Intensivos.

Tomado de: van Doorn PA. Diagnosis, treatment and prognosis of Guillain-Barre syndrome (GBS). Presse Med. 2013 Jun;42(6 Pt 2):e193-201.

## Material suplementario 8: Criterios para predicción o uso de ventilación mecánica

| Criterios para ventilación mecánica                                                                                                                                                                                                                                                                                                                                                                                                                                                                                                                                                                |
|----------------------------------------------------------------------------------------------------------------------------------------------------------------------------------------------------------------------------------------------------------------------------------------------------------------------------------------------------------------------------------------------------------------------------------------------------------------------------------------------------------------------------------------------------------------------------------------------------|
| Factores predictivos de falla ventilatoria:                                                                                                                                                                                                                                                                                                                                                                                                                                                                                                                                                        |
| <ul style="list-style-type: none"> <li>• Tiempo entre el inicio de los síntomas y la admisión menor a 7 días.</li> <li>• Incapacidad para toser.</li> <li>• Incapacidad para pararse.</li> <li>• Incapacidad para levantar los codos</li> <li>• Incapacidad para levantar la cabeza.</li> <li>• Aumento en las enzimas hepáticas séricas.</li> <li>• Capacidad vital forzada &lt;20ml/kg.</li> <li>• Presión inspiratoria máxima &lt; 30 cm H<sub>2</sub>O.</li> <li>• Presión espiratoria máxima &lt; 40 cm H<sub>2</sub>O.</li> <li>• Reducción de más del 30% en la capacidad vital.</li> </ul> |
| Datos que indican intubación inmediata:                                                                                                                                                                                                                                                                                                                                                                                                                                                                                                                                                            |
| <ul style="list-style-type: none"> <li>• Capacidad vital forzada &lt;15 ml/kg</li> <li>• Presión parcial de CO<sub>2</sub> en sangre &gt; 48 mmHg.</li> <li>• Presión parcial de O<sub>2</sub> en sangre &lt; 56 mmHg.</li> </ul>                                                                                                                                                                                                                                                                                                                                                                  |

Tomado del Instituto Mexicano del Seguro Social. Diagnóstico y Tratamiento del Síndrome de Guillain Barré en el Segundo y Tercer nivel de Atención. Instituto Mexicano del Seguro Social: Ciudad de México: 2016
